# Supplementary material for: Thermo- and pH-sensitive shape memory polyurethane containing carboxyl groups
Source: Royal Society of Chemistry journal article supplement (doi:10.1039/c5py02010g), 2016-01-01
Supplement: c5py02010g1.pdf [file c5py02010g1.pdf]

## Supplementary Information

### Thermo- and pH-sensitive Shape Memory Polyurethane Containing Carboxyl Groups

Qiuju Song,<sup>a</sup> Hongmei Chen<sup>\*ab</sup>, Shaobin Zhou<sup>b</sup>, Keqing Zhao<sup>a</sup>, Biqing Wang<sup>a</sup> and Ping Hu<sup>\*a</sup>

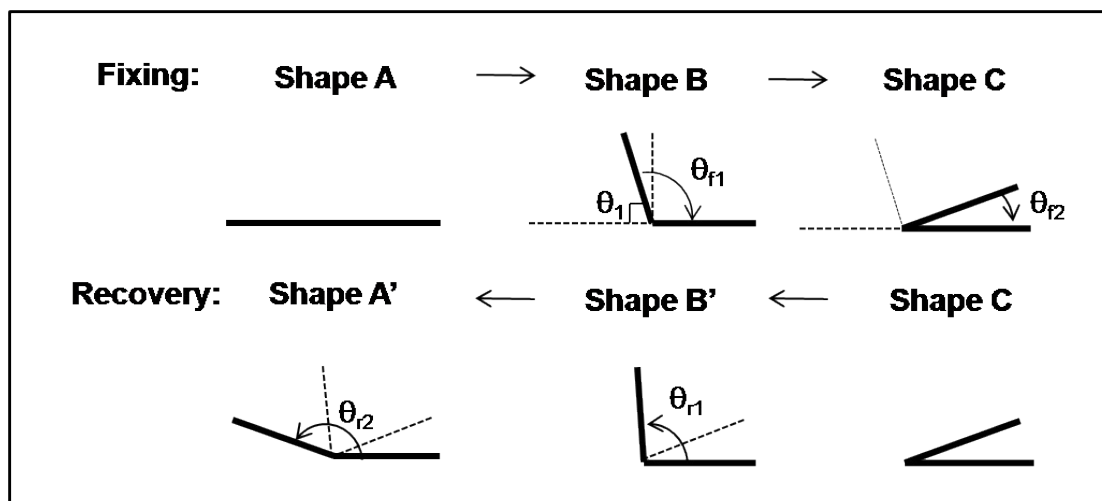

**Figure S1** The bending testing for the investigation of the triple shape-memory effect .

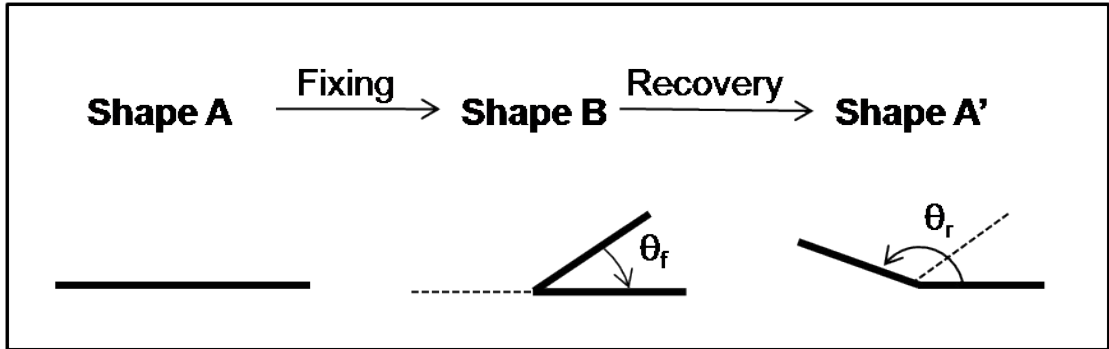

**Figure S2** The bending testing for investigation of the pH-sensitive shape memory effect

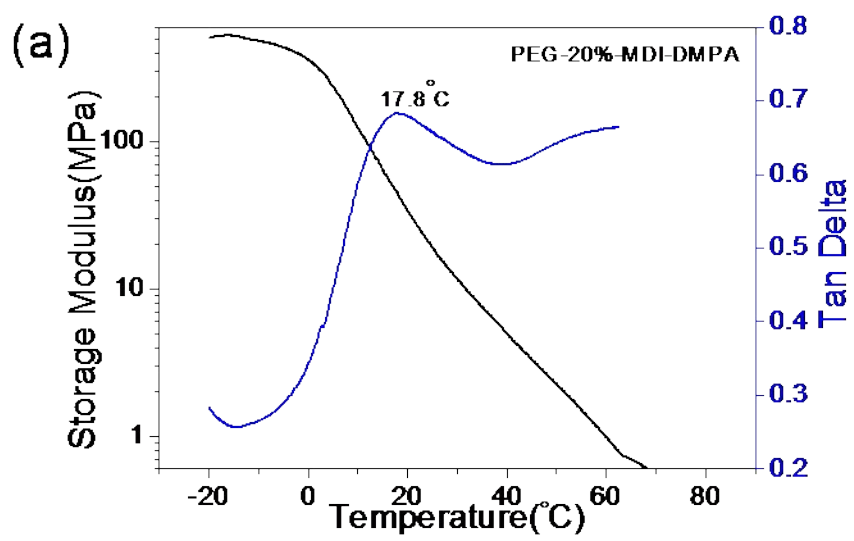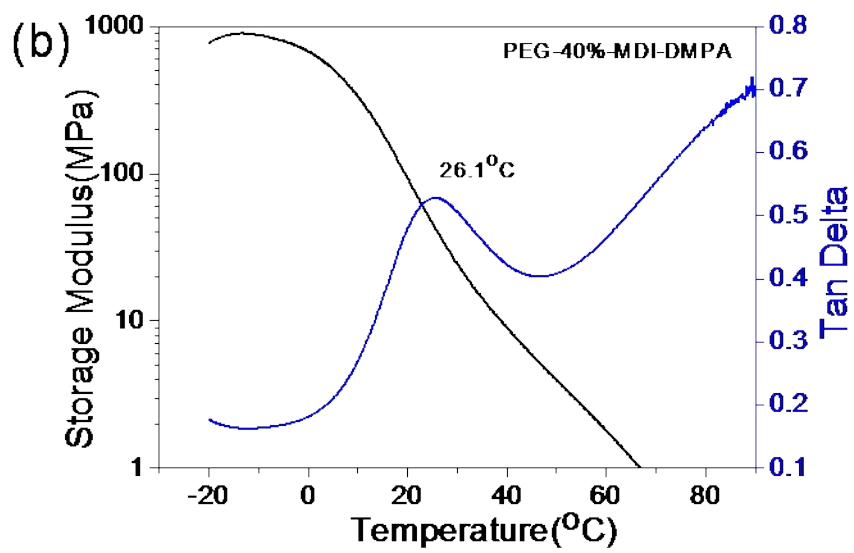

Figure S3 DMA curves of (a) PEG-20%-MDI-DMPA and (b) PEG-40%-MDI-DMPA
